# Supplementary material for: Synthesis of spiro-pyridopyridine analogues by Grubbs' catalyst mediated alkene and enyne metathesis reaction
Source: Royal Society of Chemistry journal article supplement (doi:10.1039/b603125k), 2006-01-01

**MASS OF COMPOUND 7a:**

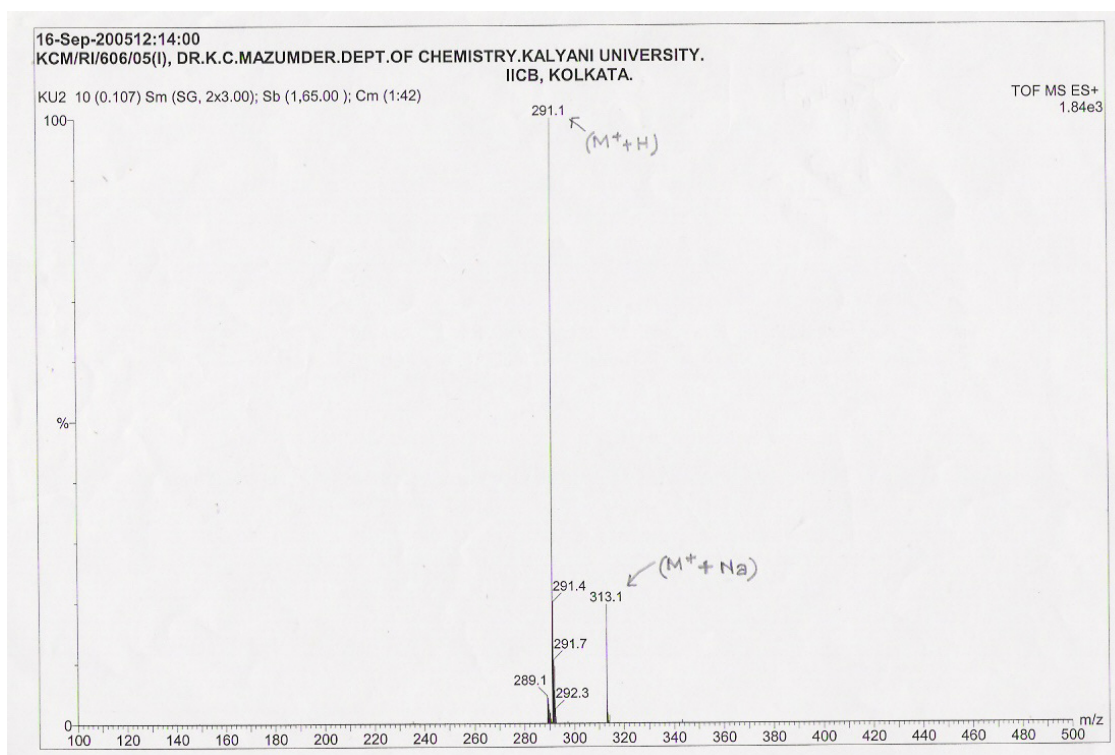

**<sup>1</sup>H NMR OF COMPOUND 7a:**

**PAGE-1**

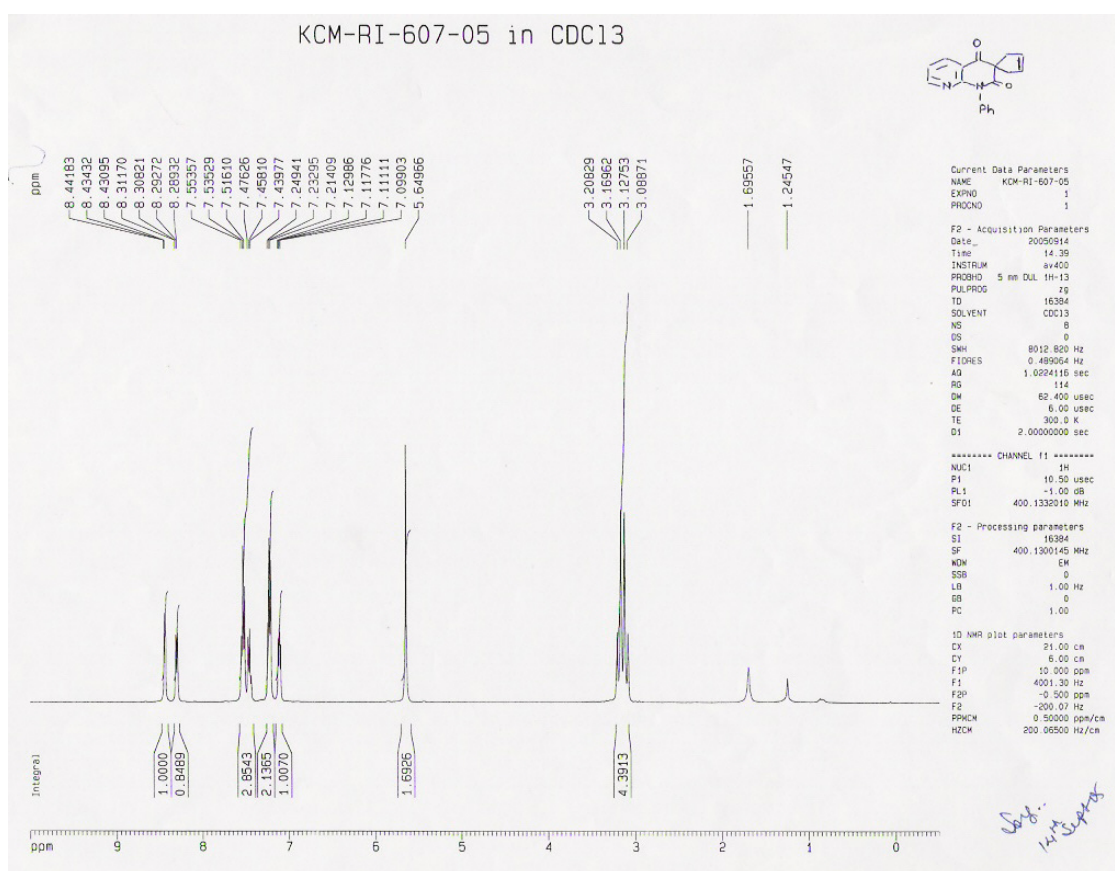

**<sup>1</sup>H NMR OF COMPOUND 7a:**

**PAGE-2(Expansion)**

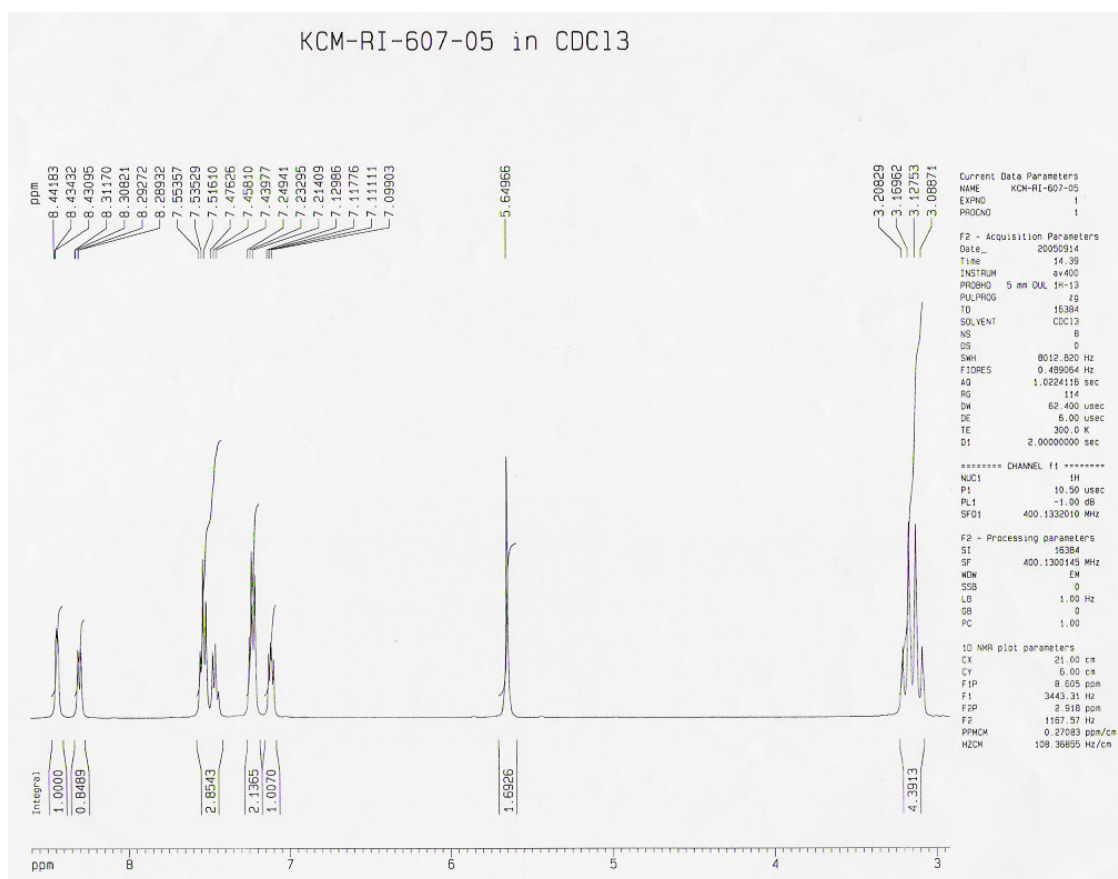

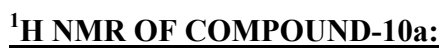

**$^1\text{H}$  NMR OF COMPOUND-10a:**

**PAGE-2(Expansion)**

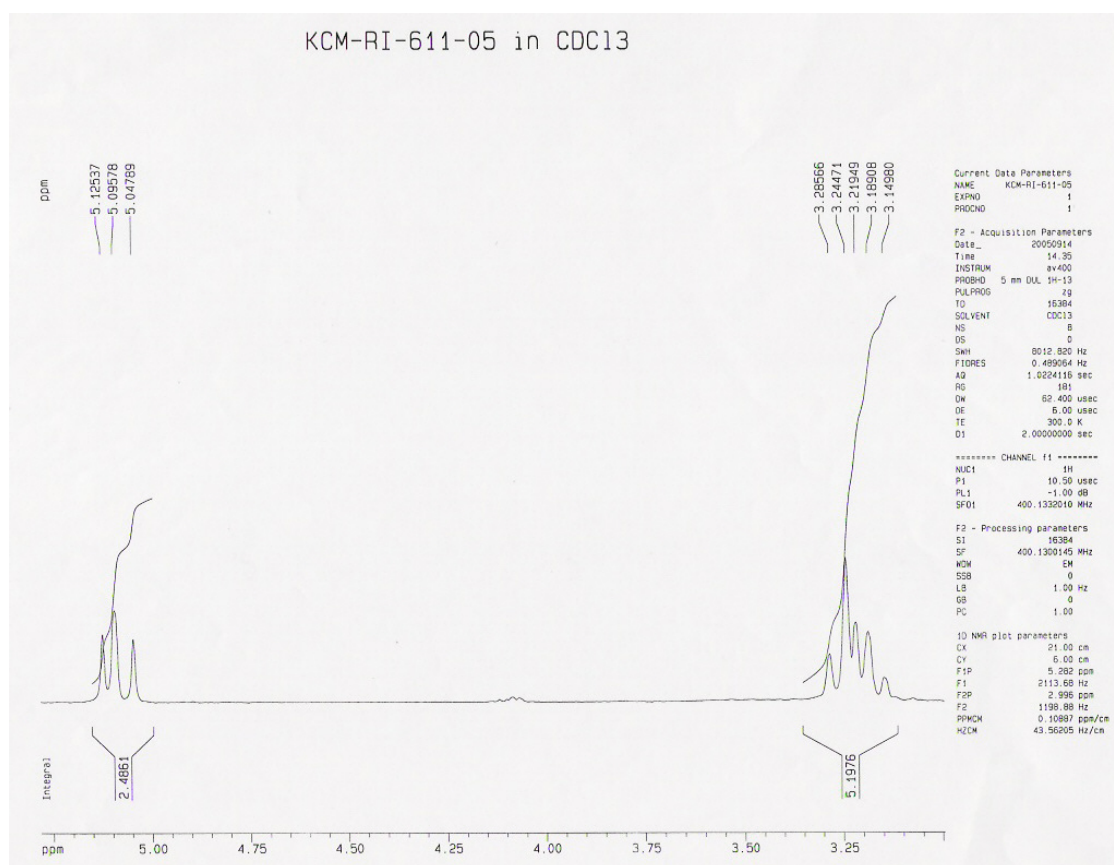



**$^1\text{H}$  NMR OF COMPOUND-10a:**

**PAGE-3(Expansion)**

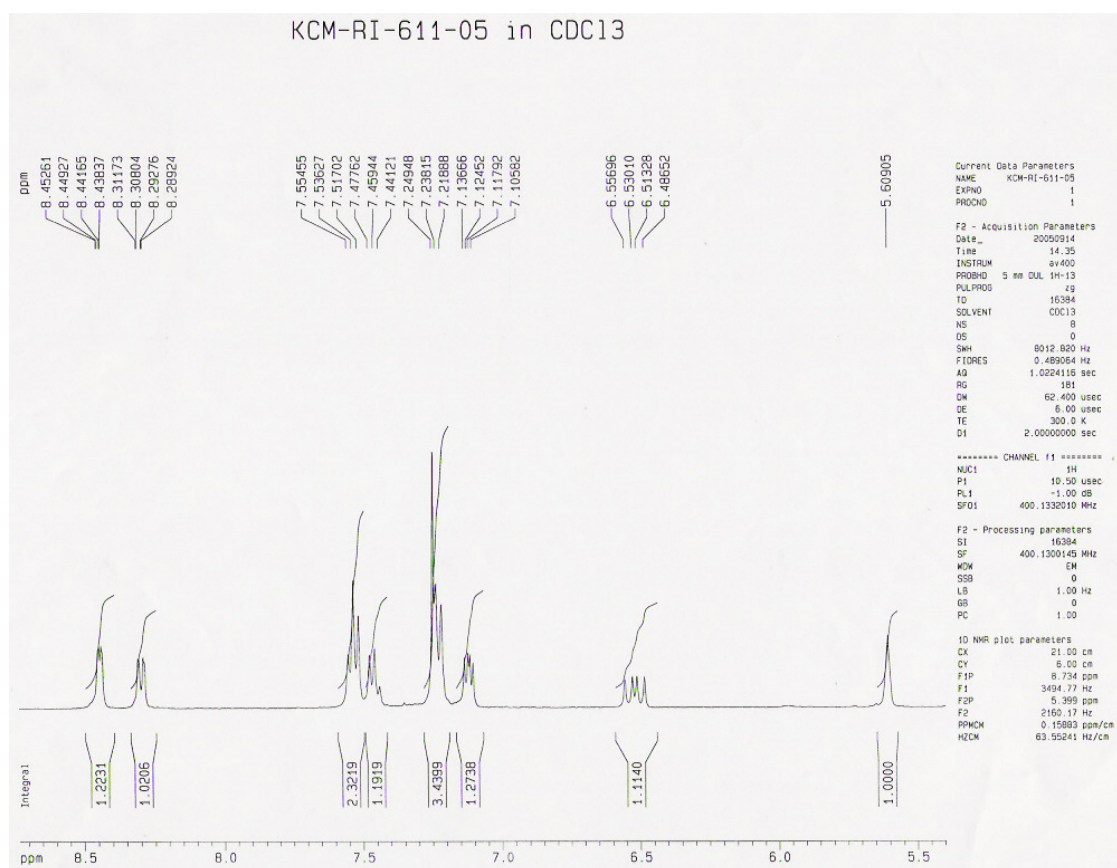

Supplement: b603125k.pdf [file b603125k.pdf]
